# Supplementary material
Source: publisher figshare collection journal article supplement (https://gsajournals.figshare.com/ndownloader/files/23153588)
Supplement: Supplementary file 1 [file 23153588]

## Sheet: IntersectionofWildtypePeaksandH
Table S4: Domains in common between ∆hH2Az and wild type
Contig	Start Position	End Position
CM002236.1	37	3306
CM002236.1	4182	8961
CM002236.1	11386	16672
CM002236.1	17248	21136
CM002236.1	34408	47172
CM002236.1	49688	50189
CM002236.1	58619	60763
CM002236.1	61705	63106
CM002236.1	89872	94957
CM002236.1	135181	136009
CM002236.1	183097	185731
CM002236.1	186976	191433
CM002236.1	192941	194081
CM002236.1	195255	199379
CM002236.1	221551	222446
CM002236.1	208293	220982
CM002236.1	255665	267559
CM002236.1	288109	304015
CM002236.1	314512	316820
CM002236.1	6454277	6456246
CM002236.1	9648830	9653330
CM002236.1	9670109	9672803
CM002236.1	9673688	9674861
CM002236.1	9680684	9683517
CM002236.1	9686287	9694172
CM002236.1	9694996	9697866
CM002236.1	9700305	9702485
CM002236.1	9757392	9764266
CM002236.1	9767685	9798873
CM002237.1	186	22882
CM002237.1	25874	29570
CM002237.1	31191	37958
CM002237.1	39099	42571
CM002237.1	50184	57383
CM002237.1	68680	79107
CM002237.1	105111	109111
CM002237.1	147047	150500
CM002237.1	1676188	1678594
CM002237.1	1734581	1737016
CM002237.1	4159104	4159750
CM002237.1	4434913	4438806
CM002237.1	4445831	4454717
CM002237.1	4461197	4478666
CM002238.1	150	16465
CM002238.1	22842	34542
CM002238.1	88309	91509
CM002238.1	165955	167720
CM002238.1	198336	199732
CM002238.1	217268	222828
CM002238.1	250643	251709
CM002238.1	225365	249841
CM002238.1	262551	266448
CM002238.1	267849	275736
CM002238.1	277375	302074
CM002238.1	327598	328873
CM002238.1	341626	343100
CM002238.1	344330	345887
CM002238.1	380802	392677
CM002238.1	393850	400611
CM002238.1	428978	430829
CM002238.1	448252	450739
CM002238.1	557266	558151
CM002238.1	4648385	4649257
CM002238.1	4649836	4651381
CM002238.1	4673080	4681023
CM002238.1	4757701	4758328
CM002238.1	4759010	4760039
CM002238.1	4771482	4773940
CM002238.1	4732457	4750253
CM002238.1	4751188	4756929
CM002238.1	4761711	4768543
CM002238.1	4775771	4804070
CM002238.1	4804805	4829066
CM002238.1	4856704	4864425
CM002238.1	4993737	4994365
CM002238.1	5014736	5017856
CM002238.1	5019370	5019871
CM002238.1	5026057	5027126
CM002238.1	5028399	5029092
CM002238.1	5060592	5061876
CM002238.1	5090944	5097523
CM002238.1	5130010	5131152
CM002238.1	5219744	5220903
CM002238.1	5224484	5224985
CM002238.1	5225979	5231135
CM002238.1	5243060	5274786
CM002239.1	205	31368
CM002239.1	32095	34491
CM002239.1	54320	57469
CM002239.1	66987	72010
CM002239.1	101535	106365
CM002239.1	108949	114955
CM002239.1	140734	143842
CM002239.1	198458	210753
CM002239.1	174801	191338
CM002239.1	224790	225797
CM002239.1	312715	344056
CM002239.1	345437	363983
CM002239.1	397304	398307
CM002239.1	373290	396465
CM002239.1	552319	555102
CM002239.1	5847017	5853837
CM002239.1	5864653	5872392
CM002239.1	5877741	5891468
CM002239.1	5912131	5914847
CM002239.1	5927612	5931009
CM002239.1	5936874	5938256
CM002239.1	5938834	5953687
CM002239.1	5954822	5955245
CM002239.1	5957252	5960238
CM002239.1	5964646	5966579
CM002239.1	5969241	5975606
CM002239.1	5976817	5981988
CM002239.1	5982873	6000746
CM002240.1	663393	664355
CM002240.1	644972	662510
CM002240.1	6025161	6026317
CM002240.1	6027493	6028406
CM002240.1	6031088	6031589
CM002240.1	6052624	6053383
CM002240.1	6060269	6067385
CM002240.1	6081073	6088393
CM002240.1	6116940	6121793
CM002240.1	6122347	6123310
CM002240.1	6151803	6153325
CM002240.1	6173801	6178977
CM002240.1	6190483	6203552
CM002240.1	6235273	6236839
CM002240.1	6211910	6233582
CM002240.1	6386340	6389052
CM002240.1	6410040	6436232
CM002241.1	103	5588
CM002241.1	8683	11977
CM002241.1	16255	21898
CM002241.1	22681	28036
CM002241.1	28608	30525
CM002241.1	36127	38841
CM002241.1	47274	48985
CM002241.1	49786	50412
CM002241.1	50927	51428
CM002241.1	65070	65571
CM002241.1	127115	130091
CM002241.1	156036	158519
CM002241.1	163731	165581
CM002241.1	190147	193664
CM002241.1	195649	196589
CM002241.1	197187	198190
CM002241.1	360414	361545
CM002241.1	390253	393001
CM002241.1	444198	446094
CM002241.1	461172	463117
CM002241.1	470005	470903
CM002241.1	478079	479232
CM002241.1	3487893	3489301
CM002241.1	3493033	3495542
CM002241.1	3496120	3497128
CM002241.1	3547947	3548573
CM002241.1	3672404	3674082
CM002241.1	3728127	3734679
CM002241.1	3709837	3727282
CM002241.1	3735574	3754894
CM002241.1	3760422	3772437
CM002241.1	3774630	3782098
CM002241.1	3803945	3808990
CM002241.1	3793862	3802606
CM002241.1	3828600	3831599
CM002241.1	4019954	4020860
CM002241.1	4064862	4066397
CM002241.1	4119204	4120492
CM002241.1	4142139	4149903
CM002241.1	4153783	4155522
CM002241.1	4157534	4171527
CM002241.1	4173343	4178615
CM002241.1	4179350	4181775
CM002241.1	4185027	4186883
CM002241.1	4188080	4190274
CM002241.1	4200192	4218336
CM002241.1	4192937	4199568
CM002242.1	204	10020
CM002242.1	12512	13525
CM002242.1	18763	20331
CM002242.1	51139	52553
CM002242.1	106035	111473
CM002242.1	250653	252723
CM002242.1	887685	891167
CM002242.1	908969	915141
CM002242.1	921381	922302
CM002242.1	923341	929756
CM002242.1	946011	947266
CM002242.1	1353387	1354423
CM002242.1	1586628	1587465
CM002242.1	3676959	3677848
CM002242.1	4106611	4111198
CM002242.1	4167423	4169328
CM002242.1	4171009	4172852
CM002242.1	4196700	4203025
CM002242.1	4215586	4218998
CM002242.1	4220284	4224168
CM002242.1	4231040	4255288
Total Domains	199
Domains in ∆hH2Az	198
Percent in common	1.00505
